# Supplementary material
Source: PubMed Central journal article supplement (PMC4617556)
Supplement: NIHMS722158-supplement-Supplement.pdf [file NIHMS722158-supplement-Supplement.pdf]

# Supplement to “Sex, lies and self-reported counts: Bayesian analysis of longitudinal heaped count data”

Forrest W. Crawford\*      Robert E. Weiss†      Marc A. Suchard‡

September 9, 2015

## 1 Laplace transform of transition probabilities for a general BDP

Here we provide expressions for the Laplace transform of the transition probability  $P_{mn}(t)$  for any  $m, n \geq 0$ , based on Crawford and Suchard (2012), who provide detailed derivations and a numerical method for inverting the Laplace transforms to obtain time-domain transition probabilities. Before stating the main result, we establish some notation. Consider the Laplace transform of  $P_{00}(t)$ ,

$$h_{00}(s) = \frac{1}{s + \lambda_0 - \frac{\lambda_0 \mu_1}{s + \lambda_1 + \mu_1 - \frac{\lambda_1 \mu_2}{s + \lambda_2 + \mu_2 - \dots}}}. \quad (1)$$

Define the partial numerators in (1) to be  $a_1 = 1$  and  $a_n = -\lambda_{n-2}\mu_{n-1}$ . Let the partial denominators be  $b_1 = s + \lambda_0$  and  $b_n = s + \lambda_{n-1} + \mu_{n-1}$  for  $n \geq 2$ . Then (1) becomes

$$f_{00}(s) = \frac{a_1}{b_1 + \frac{a_2}{b_2 + \frac{a_3}{b_3 + \dots}}}. \quad (2)$$

A more compact representation of this continued fraction is

$$f_{00}(s) = \frac{a_1}{b_1 +} \frac{a_2}{b_2 +} \frac{a_3}{b_3 +} \dots \quad (3)$$

Now the  $k$ th approximant of  $f_{00}(s)$  is the truncated continued fraction

$$f_{00}^{(k)}(s) = \frac{a_1}{b_1 +} \frac{a_2}{b_2 +} \dots \frac{a_k}{b_k} = \frac{A_k(s)}{B_k(s)}. \quad (4)$$

where  $A_k(s)$  and  $B_k(s)$  are the  $k$ th partial numerator and denominator of the continued fraction (2).

---

\*Department of Biostatistics, Yale School of Public Health, New Haven, CT 06510-8043 USA; [forrest.crawford@yale.edu](mailto:forrest.crawford@yale.edu)

†Department of Biostatistics, UCLA Fielding School of Public Health, Los Angeles, CA 90095-1772 USA; [robweiss@ucla.edu](mailto:robweiss@ucla.edu)

‡Departments of Biomathematics, Biostatistics and Human Genetics, University of California, Los Angeles, Los Angeles, CA 90095-1766 USA; [msuchard@ucla.edu](mailto:msuchard@ucla.edu)

**Theorem 1** *The Laplace transform of the transition probability  $P_{m,n}(t)$  is given by*

$$f_{m,n}(s) = \begin{cases} \left( \prod_{j=n+1}^m \mu_j \right) \frac{B_n(s)}{B_{m+1}(s)+} \frac{B_m(s)a_{m+2}}{b_{m+2}+} \frac{a_{m+3}}{b_{m+3}+} \dots & \text{for } n \leq m, \\ \left( \prod_{j=m}^{n-1} \lambda_j \right) \frac{B_m(s)}{B_{n+1}(s)+} \frac{B_n(s)a_{n+2}}{b_{n+2}+} \frac{a_{n+3}}{b_{n+3}+} \dots & \text{for } m \leq n, \end{cases} \quad (5)$$

where  $a_n$ ,  $b_n$ , and  $B_n$  are as defined above (Murphy and O'Donohoe, 1975; Crawford and Suchard, 2012).

## 2 Full posterior

Let  $\mathbf{X}$  and  $\mathbf{Y}$  be the collection of all true and reported counts respectively for all subjects and timepoints. Likewise, let  $\mathbf{Z}$  and  $\mathbf{W}$  be the collection of all subject- and timepoint-specific covariate vectors, and let  $\boldsymbol{\alpha}$  and  $\boldsymbol{\beta}$  be the corresponding fixed and random effects. The posterior density falls out as

$$\begin{aligned} p(\boldsymbol{\alpha}, \boldsymbol{\beta}, \boldsymbol{\theta}, \boldsymbol{\gamma}, \boldsymbol{\Sigma}_\beta, \mathbf{X} \mid \mathbf{Y}, \mathbf{Z}, \mathbf{W}) &\propto p(\mathbf{Y} \mid \mathbf{X}, \boldsymbol{\theta}, \boldsymbol{\gamma}) p(\mathbf{X} \mid \mathbf{Z}, \mathbf{W}, \boldsymbol{\alpha}, \boldsymbol{\beta}) \\ &\quad \times \Pr(\boldsymbol{\alpha}) p(\boldsymbol{\beta} \mid \boldsymbol{\Sigma}_\beta) p(\boldsymbol{\theta}) p(\boldsymbol{\gamma}) \Pr(\boldsymbol{\Sigma}_\beta) \\ &= \left[ \prod_{i=1}^N \prod_{t=1}^{n_i} p(Y_{it} \mid X_{it}, \boldsymbol{\theta}, \boldsymbol{\gamma}) p(X_{it} \mid \mathbf{Z}_{it}, \mathbf{W}_{it}, \boldsymbol{\alpha}, \boldsymbol{\beta}_i) \right] \\ &\quad \times p(\boldsymbol{\alpha}) p(\boldsymbol{\beta} \mid \boldsymbol{\Sigma}_\beta) p(\boldsymbol{\theta}) p(\boldsymbol{\gamma}) p(\boldsymbol{\Sigma}_\beta). \end{aligned} \quad (6)$$

## 3 Sampling $\boldsymbol{\alpha}$

The full conditional distribution of  $\boldsymbol{\alpha}$  is

$$\begin{aligned} \Pr(\boldsymbol{\alpha} \mid \mathbf{X}, \mathbf{Y}, \mathbf{Z}, \mathbf{W}, \boldsymbol{\theta}, \boldsymbol{\beta}, \boldsymbol{\Sigma}_\beta) &= \Pr(\boldsymbol{\alpha} \mid \mathbf{X}, \mathbf{Z}, \mathbf{W}, \boldsymbol{\beta}, \boldsymbol{\Sigma}_\beta) \\ &\propto \Pr(\mathbf{X} \mid \mathbf{Z}, \mathbf{W}, \boldsymbol{\alpha}, \boldsymbol{\beta}) \Pr(\boldsymbol{\alpha}) \\ &= \left[ \prod_{i=1}^N \prod_{t=1}^{n_i} \Pr(X_{it} \mid \mathbf{Z}_{it}, \mathbf{W}_{it}, \boldsymbol{\alpha}, \boldsymbol{\beta}_i) \right] \Pr(\boldsymbol{\alpha}). \end{aligned} \quad (7)$$

Since  $X_{it}$  is distributed according to the GLMM with mean  $\eta_{it} = \exp(\mathbf{W}_{it}\boldsymbol{\alpha} + \mathbf{Z}_{it}\boldsymbol{\beta}_i)$ , there is no closed-form expression for the full conditional distribution of  $\boldsymbol{\alpha}$  in general. Therefore, we specify a proposal distribution as the normal approximation to the likelihood at the previous value of  $\boldsymbol{\alpha}$  times the conjugate normal prior for  $\boldsymbol{\alpha}$ , and we perform a Metropolis accept/reject step to obtain the next sample of  $\boldsymbol{\alpha}$ .

## 4 Sampling $\boldsymbol{\beta}_i$

Similarly, the full conditional distribution of  $\boldsymbol{\beta}_i$  is

$$\begin{aligned} \Pr(\boldsymbol{\beta}_i \mid \mathbf{X}_i, \mathbf{Z}_i, \mathbf{W}_i, \boldsymbol{\theta}, \boldsymbol{\alpha}, \boldsymbol{\Sigma}_\beta) &\propto \Pr(\mathbf{X}_i \mid \mathbf{Z}_i, \mathbf{W}_i, \boldsymbol{\alpha}, \boldsymbol{\beta}_i) \Pr(\boldsymbol{\beta}_i \mid \boldsymbol{\Sigma}_\beta) \\ &= \left[ \prod_{t=1}^{n_i} \Pr(X_{it} \mid \mathbf{Z}_{it}, \mathbf{W}_{it}, \boldsymbol{\alpha}, \boldsymbol{\beta}_i) \right] \Pr(\boldsymbol{\beta}_i \mid \boldsymbol{\Sigma}_\beta). \end{aligned} \quad (8)$$

We also sample each  $\beta_i$  using a Metropolis-Hastings step with a proposal density derived from a normal approximation as above for  $\alpha$ .

## 5 Sampling $\theta$

The full conditional distribution of  $\theta$  is

$$\begin{aligned} \Pr(\theta \mid \mathbf{X}, \mathbf{Y}, \mathbf{Z}, \mathbf{W}, \alpha, \beta, \Sigma_\beta, \gamma) &\propto \Pr(\theta \mid \mathbf{X}, \mathbf{Y}, \gamma) \\ &\propto \Pr(\mathbf{Y} \mid \mathbf{X}, \theta, \gamma) \Pr(\theta) \\ &= \left[ \prod_{i=1}^N \prod_{t=1}^{n_i} \Pr(Y_{it} \mid X_{it}, \theta, \gamma) \right] \Pr(\theta). \end{aligned} \tag{9}$$

To keep the elements of  $\theta$  non-negative, we use a truncated normal proposal distribution

$$\theta_\ell^* \sim \text{Normal}_+ \left( \theta_\ell^{(j)}, \sigma_\theta^2 \right) \tag{10}$$

centered at the current value  $\theta_\ell^{(j)}$  and where  $\sigma_\theta^2$  is a tuning parameter chosen to optimize mixing of the chain.  $\text{Normal}_+(\cdot)$  denotes the distribution with density

$$\frac{1}{\sqrt{2\pi\sigma_\theta}} \exp \left[ -\frac{(\theta - \theta^{(j)})^2}{2\sigma_\theta^2} \right] / \left( 1 - \Phi(-\theta^{(j)}/\sigma_\theta) \right) \tag{11}$$

for  $\theta > 0$  and 0 otherwise, where  $\Phi(\cdot)$  is the standard normal distribution function. We perform a Metropolis-Hastings accept/reject step to find the next sample of  $\theta$ .

## 6 Sampling $\gamma$

The full conditional distribution of  $\gamma$  is similar to that of  $\theta$ :

$$\begin{aligned} \Pr(\gamma \mid \mathbf{X}, \mathbf{Y}, \mathbf{Z}, \mathbf{W}, \alpha, \beta, \Sigma_\beta, \theta) &\propto \Pr(\gamma \mid \mathbf{X}, \mathbf{Y}, \theta) \\ &\propto \Pr(\mathbf{Y} \mid \mathbf{X}, \theta, \gamma) \Pr(\gamma) \\ &= \left[ \prod_{i=1}^N \prod_{t=1}^{n_i} \Pr(Y_{it} \mid X_{it}, \theta, \gamma) \right] \Pr(\gamma). \end{aligned} \tag{12}$$

To arrive at a valid proposal for  $\gamma$ , we take the monotonicity constraint  $\gamma_0 < \dots < \gamma_J$  into account using a rejection sampling method. We propose a new sample  $\gamma^*$  from the previous value of  $\gamma$  using a multivariate Normal kernel:

$$\gamma^* \sim \text{Normal} \left( \gamma^{(j)}, \Sigma_\gamma \right) \tag{13}$$

centered at the current value of  $\gamma_\ell^{(j)}$  and reject the sample if the constraint is not satisfied. We choose the tuning parameter  $\Sigma_\gamma$  to optimize mixing. We perform an accept/reject Metropolis-Hastings step to choose the next value of  $\gamma$ .

## References

- Crawford FW, Suchard MA (2012) Transition probabilities for general birth-death processes with applications in ecology, genetics, and evolution. *Journal of Mathematical Biology* 65:553–580
- Murphy JA, O’Donohoe MR (1975) Some properties of continued fractions with applications in Markov processes. *IMA Journal of Applied Mathematics* 16:57–71
